# Supplementary material
Source: PubMed Central journal article supplement (PMC1347974)
Supplement: pnas_0506540103_3.pdf [file pnas_0506540103_3.pdf]

**A.**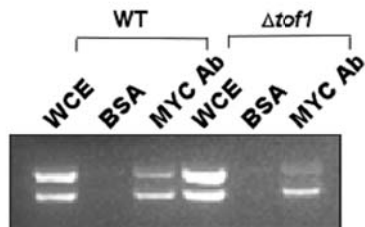**B.**

| Sample Name                 | Input DNA<br>Mean Ct | BSA, Mean<br>Ct  | Imm.PPT.<br>Mean Ct |
|-----------------------------|----------------------|------------------|---------------------|
| WT (Fob-<br>myc)            | $22.37 \pm 0.04$     | $25.17 \pm 0.09$ | $19.33 \pm 0.32$    |
| $\Delta tof1$ (Fob-<br>myc) | $22.52 \pm 0.09$     | $24.41 \pm 0.08$ | $17.83 \pm 0.60$    |
