# Supplementary material
Source: PubMed Central journal article supplement (PMC1347974)

WT

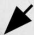

$\Delta csm3$

Vector  
in  $\Delta csm3$

CSM3  
in  $\Delta csm3$

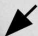

Supplement: pnas_0506540103_1.pdf [file pnas_0506540103_1.pdf]

**A.**

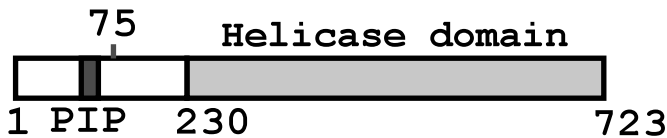

**B.**

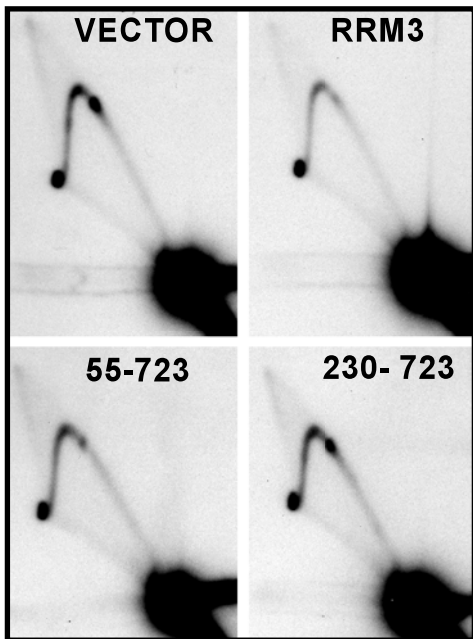

Supplement: pnas_0506540103_2.pdf [file pnas_0506540103_2.pdf]
